# Supplementary material for: Human Endometrial Carcinogenesis Is Associated with Significant Reduction in Long Non-Coding RNA, TERRA
Source: PubMed Central journal article supplement (PMC7698627; doi:10.3390/ijms21228686), 2020-11-18

**Supplementary table 1. Primer sequences used for qPCR amplification**

| Primer                               | Sequence                                                            | PCR conditions                                               | Primer efficiency               | References                |
|--------------------------------------|---------------------------------------------------------------------|--------------------------------------------------------------|---------------------------------|---------------------------|
| <i>TERRA</i> Ch 1q-2q-4q-10q-13q-22q | F:5'GAATCCTGCGCACCGAGAT<br>R:5'CTGCACTTGAACCCTGCAATAC               | 95°C, 10 min                                                 | 101.1%<br>R <sup>2</sup> =0.995 | (Diman, et al., 2016)     |
| <i>TERRA</i> Ch16p                   | F: 5'TGT GTT TCA ACG CTG CAA CTG<br>R: 5'AGT TAG AAC GGT TCA GTG TG | followed by 40 cycles of                                     | 95.1%<br>R <sup>2</sup> =0.991  | (Wang, et al., 2015)      |
| <i>TERRA</i> Ch20q                   | F:5'GAAGTTGCTGGGTTCTATGG<br>R:5'ATGGTGCAGACACTGTGG                  | 98°C, 5s<br>95°C, 10s                                        | 105.2%<br>R <sup>2</sup> =0.986 | (Montero, et al., 2016)   |
| <i>ACTB</i>                          | F:5'TGTACGCCAACACAGTGCTG-3<br>R:5'GCTGGAAGGTGGACAGCGA-3             | 60°C, 30s                                                    | 94.6%<br>R <sup>2</sup> =0.999  | (Wang, Zhao and Lu, 2015) |
| <i>PPIA</i>                          | F:5'- AGACAAGGTCCCAAAGAC-3<br>R:5'- ACCACCCTGACACATAAA-3            | 95°C, 2 min<br>followed by 40 cycles of 95°C<br>5s, 60°C 30s | 100.1%<br>R <sup>2</sup> =0.998 | (Jacob, et al., 2013)     |

References :

- Diman A, Boros J, Poulain F, Rodriguez J, Purnelle M, Episkopou H, Bertrand L, Francaux M, Deldicque L, Decottignies A. Nuclear respiratory factor 1 and endurance exercise promote human telomere transcription. *Sci Adv* 2016;2.
- Jacob F, Guertler R, Naim S, Nixdorf S, Fedier A, Hacker NF, Heinzelmann-Schwarz V. Careful Selection of Reference Genes Is Required for Reliable Performance of RT-qPCR in Human Normal and Cancer Cell Lines. *Plos One* 2013;8.
- Montero JJ, de Silanes IL, Grana O, Blasco MA. Telomeric RNAs are essential to maintain telomeres. *Nature communications* 2016;7.
- Wang CQ, Zhao L, Lu SM. Role of TERRA in the Regulation of Telomere Length. *Int J Biol Sci* 2015;11: 316-323.

**Supplementary Table 2. Primary antibodies and conditions for IHC**

| Primary Antibody | Type       | Clone   | Supplier                | HIAR*<br>(min) | Dilution | Incubation Time | Conditions |
|------------------|------------|---------|-------------------------|----------------|----------|-----------------|------------|
|                  |            |         |                         |                |          | Time (hour)     | Temp (°C)  |
| ER $\alpha$      | Monoclonal | 6F11    | NovoCastra <sup>1</sup> | 2              | 1:50     | 2               | 18         |
| ER $\beta$       | Monoclonal | PPG5/10 | Abcam <sup>2</sup>      | 2              | 1:50     | 20              | 4          |
| PR               | Monoclonal | PgR 636 | DAKO <sup>3</sup>       | 2              | 1:1000   | 1               | 18         |
| AR               | Monoclonal | AR441   | DAKO <sup>3</sup>       | 2              | 1:75     | 20              | 4          |
| Ki67             | Monoclonal | MM1     | NovoCastra <sup>1</sup> | 2              | 1:200    | 20              | 4          |
| TRF1             | Monoclonal | MM1     | Santa Cruz <sup>4</sup> | 2              | 1:50     | 20              | 4          |
| TRF2             | Monoclonal | MM1     | Santa Cruz <sup>4</sup> | 2              | 1:200    | 20              | 4          |

\*Heat induced antigen retrieval by pressure cooking in citrate buffer pH 6. <sup>1</sup>Dallas, Texas, USA;

<sup>1</sup> Newcastle, UK; <sup>2</sup> Cambridge, UK; <sup>3</sup> Ely, Cambridgeshire, UK; <sup>4</sup> Heidelberg, Germany

# Supplementary Figure 1

Total Patients: 589  
Condition: Uterine cancer

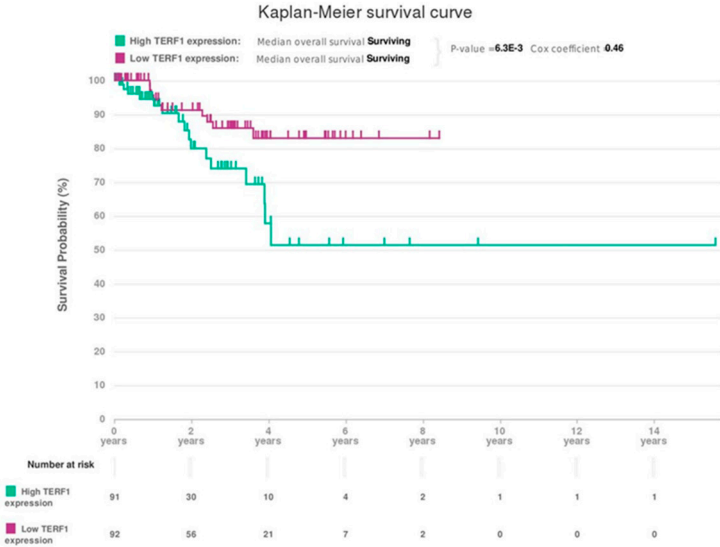

Supplement: ijms-21-08686-s001.pdf [file ijms-21-08686-s001.pdf]
